# Supplementary material for: The effect of different anaesthetics on echocardiographic evaluation of diastolic dysfunction in a heart failure with preserved ejection fraction model
Source: PubMed Central journal article supplement (PMC7518268; doi:10.1038/s41598-020-72924-5), 2020-09-24
Supplement: 41598_2020_72924_MOESM1_ESM.pdf [file 41598_2020_72924_MOESM1_ESM.pdf]

**The effect of different anaesthetics on echocardiographic evaluation of diastolic dysfunction in a heart failure with preserved ejection fraction model.**

Ilona Cuijpers<sup>a,b</sup>, Paolo Carai<sup>a</sup>, Pedro Mendes-Ferreira<sup>c,d</sup>, Steven J. Simmonds<sup>a</sup>, Paul Mulder<sup>e</sup>, Daniela Miranda-Silva<sup>d</sup>, Daria De Giorgio<sup>a,f</sup>, Peter Pokreisz<sup>a</sup>, Stephane Heymans<sup>a,b,g</sup>, and Elizabeth A.V. Jones<sup>a,b\*</sup>.

<sup>a</sup> Centre for Molecular and Vascular Biology, Department of Cardiovascular Sciences, KU Leuven, Herestraat 49, bus 911, 3000 Leuven, Belgium

<sup>b</sup> Department of Cardiology, Maastricht University, CARIM School for Cardiovascular Diseases, Universiteitssingel 50, 6229 ER Maastricht, Netherlands

<sup>c</sup> Department of Chronic Diseases, Metabolism & Aging, KU Leuven, Respiratory Division, Herestraat 49, bus 707, 3000 Leuven, Belgium

<sup>d</sup> Department of Physiology and Cardiothoracic Surgery, University of Porto, Cardiovascular R&D Unit, Faculty of Medicine, Alameda Prof. Hernâni Monteiro, 4200-319 Porto, Portugal

<sup>e</sup> Institut National de la Santé et de la Recherche Médicale (Inserm) UMR1096, Faculty of Medicine and Pharmacy, 22 Boulevard Gambetta, 76183 Rouen, France

<sup>f</sup> Department of Cardiovascular Medicine, Laboratory of Cardiopulmonary Pathophysiology, Istituto di Ricerche Farmacologiche “Mario Negri” IRCCS, Via Mario Negri 2, 201566, Milan, Italy

<sup>g</sup> ICIN-Netherlands Heart Institute, Holland Heart House, Moreelsepark 1, 3511 EP Utrecht, Netherlands

Corresponding author:

Prof. Elizabeth A V Jones, PhD

Centre for Molecular and Vascular Biology, Department of Cardiovascular Sciences, KU Leuven, Herestraat 49, bus 911, 3000 Leuven, Belgium

E-mail [liz.jones@kuleuven.be](mailto:liz.jones@kuleuven.be)

**Supplementary Figures**

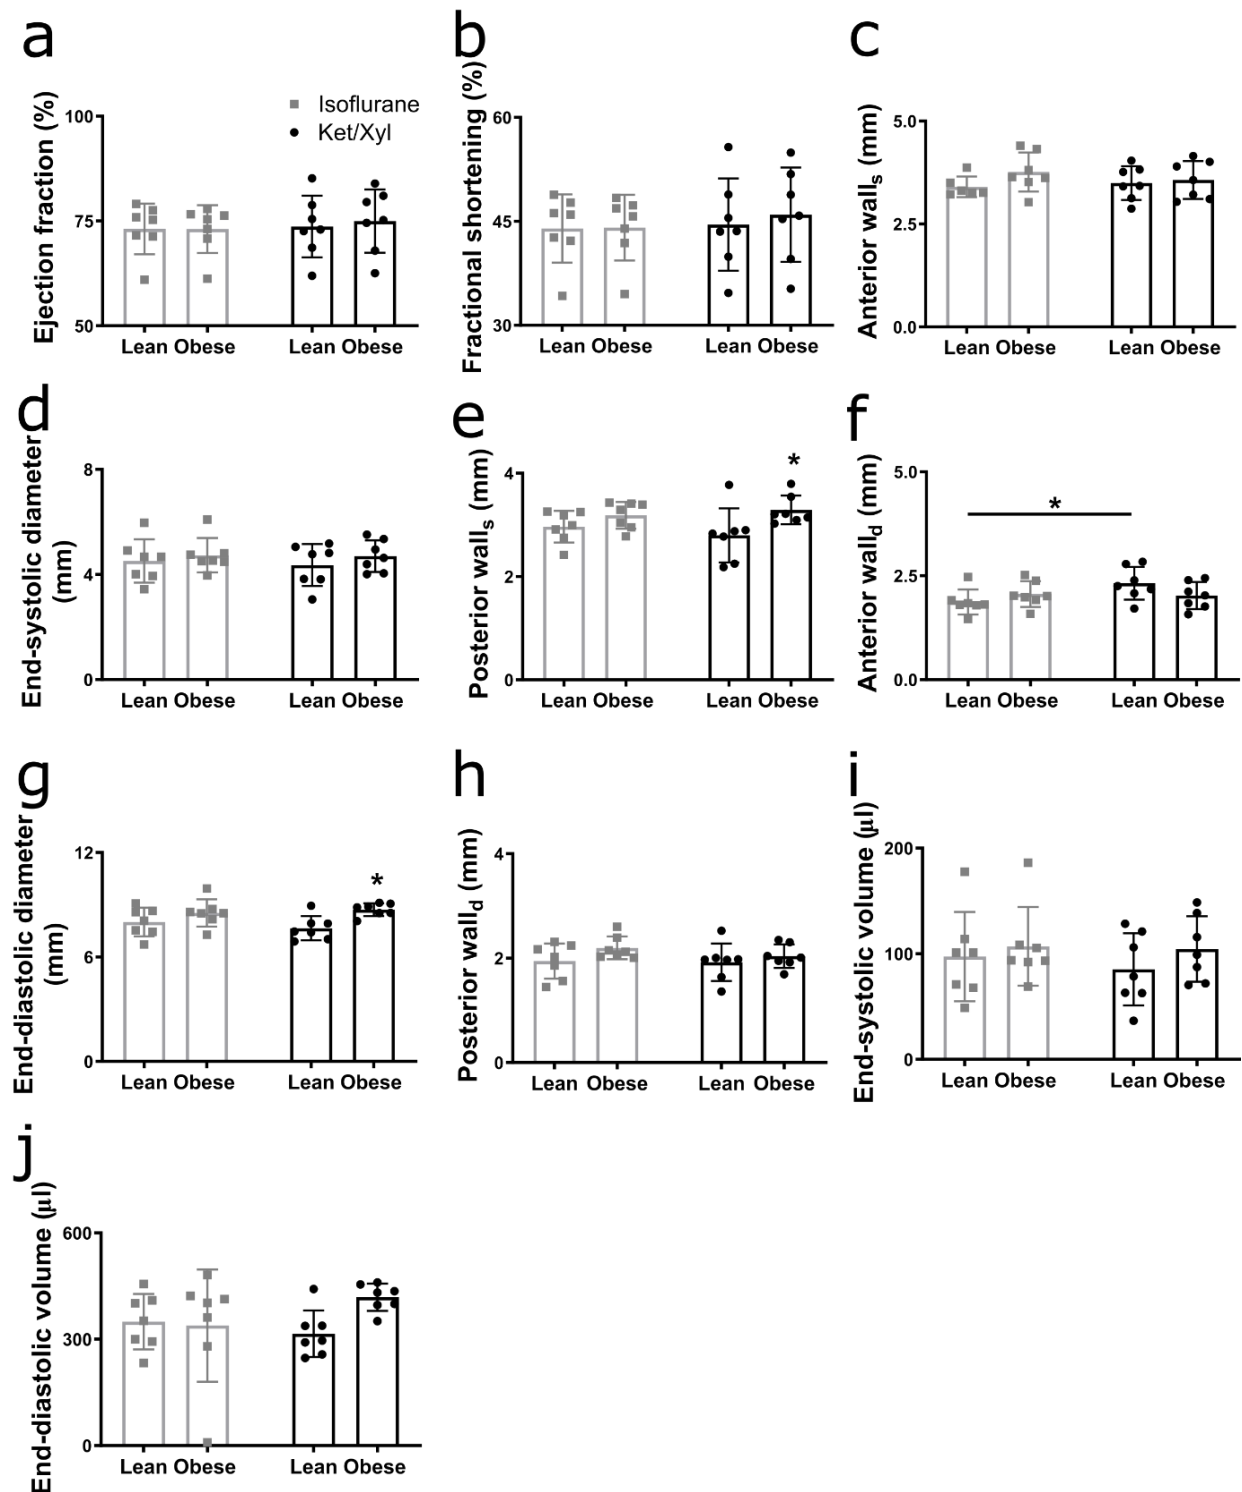

**Supplementary Figure S1- The effects of ketamine/xylazine on systolic function and left ventricular dimension and volumes.** Ejection fraction (a), fractional shortening (b), anterior wall thickness in systole (c), end-systolic diameter (d), posterior wall thickness in systole (e), anterior wall thickness in diastole (f), end-diastolic diameter (g), posterior wall thickness in diastole (h), and end-systolic and -diastolic volumes (i,j) in 20-week-old isoflurane- or ketamine/xylazine-anaesthetised lean and obese ZSF1 rats (n=7 per group). Values are presented as mean ± SD. \*P<0.05. <sub>d</sub>, in diastole; Ket/Xyl, ketamine/xylazine; <sub>s</sub>, in systole.

## Supplementary Tables

Supplementary Table S1- Echocardiography parameters in isoflurane- or ketamine/xylazine- anaesthetised lean and obese ZSF1 rats

| Parameter                                                | Lean-<br>Isoflurane<br>(n=7) | Obese-<br>Isoflurane<br>(n=7) | Lean-<br>Ket/Xyl<br>(n=7) | Obese-<br>Ket/Xyl<br>(n=7) |
|----------------------------------------------------------|------------------------------|-------------------------------|---------------------------|----------------------------|
| Heart rate (bpm)                                         | 360 ± 20                     | 310 ± 26***                   | 243 ± 25###               | 200 ± 20**.,###            |
| Stroke volume (µl)                                       | 252 ± 43                     | 287 ± 41                      | 230 ± 42                  | 314 ± 46**                 |
| Stroke volume, <sub>i</sub> (µl/cm <sup>2</sup> )        | 0.51 ± 0.09                  | 0.47 ± 0.07                   | 0.50 ± 0.14               | 0.52 ± 0.08                |
| Cardiac output (ml/min)                                  | 90 ± 12                      | 88 ± 14                       | 55 ± 7.3###               | 63 ± 12##                  |
| Cardiac index (ml/min/cm <sup>2</sup> )                  | 0.18 ± 0.02                  | 0.14 ± 0.03*                  | 0.12 ± 0.02###            | 0.11 ± 0.02##              |
| Anterior wall <sub>d</sub> (mm)                          | 1.9 ± 0.3                    | 2.1 ± 0.3                     | 2.3 ± 0.4#                | 2.0 ± 0.3                  |
| Anterior wall <sub>s</sub> (mm)                          | 3.4 ± 0.3                    | 3.8 ± 0.5                     | 3.5 ± 0.4                 | 3.6 ± 0.5                  |
| End-diastolic diameter (mm)                              | 8.0 ± 0.8                    | 8.5 ± 0.8                     | 7.7 ± 0.7                 | 8.7 ± 0.4*                 |
| End-systolic diameter (mm)                               | 4.5 ± 0.8                    | 4.7 ± 0.7                     | 4.4 ± 0.8                 | 4.7 ± 0.6                  |
| Posterior wall <sub>d</sub> (mm)                         | 1.9 ± 0.3                    | 2.2 ± 0.2                     | 1.9 ± 0.4                 | 2.0 ± 0.3                  |
| Posterior wall <sub>s</sub> (mm)                         | 3.0 ± 0.3                    | 3.2 ± 0.3                     | 2.8 ± 0.5                 | 3.3 ± 0.3*                 |
| End-diastolic volume (µl)                                | 350 ± 78                     | 391 ± 61                      | 316 ± 66                  | 419 ± 39                   |
| End-diastolic volume, <sub>i</sub> (µl/cm <sup>2</sup> ) | 0.70 ± 0.16                  | 0.64 ± 0.11                   | 0.68 ± 0.20               | 0.70 ± 0.06                |
| End-systolic volume (µl)                                 | 97 ± 42                      | 107 ± 37                      | 85 ± 34                   | 105 ± 31                   |
| End-systolic volume, <sub>i</sub> (µl/cm <sup>2</sup> )  | 0.20 ± 0.08                  | 0.18 ± 0.06                   | 0.18 ± 0.08               | 0.10 ± 0.05                |
| Ejection fraction (%)                                    | 73 ± 6.0                     | 73 ± 5.7                      | 74 ± 7.4                  | 75 ± 7.5                   |
| Fractional shortening (%)                                | 44 ± 4.9                     | 44 ± 4.8                      | 45 ± 6.7                  | 46 ± 6.8                   |
| Aortic ejection time (ms)                                | 74 ± 7.5                     | 84 ± 7.4                      | 74 ± 9.9                  | 103 ± 13***.,##            |
| Isovolumic contraction time (ms)                         | 19 ± 3.0                     | 19 ± 2.8                      | 15 ± 3.3                  | 18 ± 2.8                   |
| Non-flow time (ms)                                       | 125 ± 14                     | 141 ± 11                      | 127 ± 13                  | 167 ± 14***.,##            |
| Myocardial performance index (AU)                        | 0.69 ± 0.05                  | 0.67 ± 0.05                   | 0.68 ± 0.04               | 0.62 ± 0.04*               |
| Systolic peak wave (mm/s)                                | 45 ± 13                      | 37 ± 4.0                      | 40 ± 3.0                  | 33 ± 9.8                   |
| E'/A'                                                    | 1.7 ± 0.8                    | 1.3 ± 0.4                     | 2.3 ± 0.84                | 3.0 ± 0.53*.,###           |

Values are presented as mean ± SD. A', late mitral annulus peak velocity; <sub>d</sub>, in diastole; E', early diastolic mitral annulus peak velocity; <sub>i</sub>, indexed for body surface area, calculated as 9.1 \* body weight in grams<sup>2/3</sup>; <sub>s</sub>, in systole. \*P<0.05, \*\*<0.01, and \*\*\*<0.001 comparing ketamine/xylazine- or isoflurane-anaesthetised Lean versus Obese rats. #P<0.05, ##<0.01, and ###P<0.001 comparing isoflurane- versus ketamine/xylazine-anaesthetised in each group of rats (either Lean or Obese).

**Supplementary table S2- Echocardiography parameters of isoflurane-anaesthetised lean and obese ZSF1 rats treated with or without ivabradine.**

| Parameter                                                | Lean Saline (n=7) | Obese Saline (n=8)       | Lean +Ivabradine (n=7)  | Obese +Ivabradine (n=8)      |
|----------------------------------------------------------|-------------------|--------------------------|-------------------------|------------------------------|
| Heart rate (bpm)                                         | 369 ± 47          | 317 ± 28*                | 302 ± 41 <sup>###</sup> | 258 ± 19 <sup>*,###</sup>    |
| Stroke volume (µl)                                       | 291 ± 18          | 328 ± 31                 | 399 ± 62 <sup>#</sup>   | 359 ± 31                     |
| Stoke volume, <sub>i</sub> (µl/cm <sup>2</sup> )         | 0.53 ± 0.04       | 0.50 ± 0.09              | 0.61 ± 0.11             | 0.54 ± 0.10                  |
| Cardiac output (ml/min)                                  | 108 ± 16          | 104 ± 12                 | 101 ± 23                | 93 ± 8.7 <sup>#</sup>        |
| Cardiac index (ml/min/cm <sup>2</sup> )                  | 0.19 ± 0.03       | 0.16 ± 0.03              | 0.18 ± 0.04             | 0.14 ± 0.03*                 |
| Anterior wall <sub>d</sub> (mm)                          | 2.1 ± 0.2         | 2.1 ± 0.2                | 2.1 ± 0.3               | 2.1 ± 0.1                    |
| Anterior wall <sub>s</sub> (mm)                          | 4.1 ± 0.3         | 3.9 ± 0.3                | 4.0 ± 0.3               | 3.8 ± 0.3                    |
| End-diastolic diameter (mm)                              | 8.1 ± 0.1         | 8.8 ± 0.3**              | 8.5 ± 0.6               | 9.1 ± 0.3*                   |
| End-systolic diameter (mm)                               | 3.7 ± 0.3         | 4.4 ± 0.2**              | 3.9 ± 0.5               | 4.7 ± 0.4 <sup>***</sup>     |
| Posterior wall <sub>d</sub> (mm)                         | 2.1 ± 0.4         | 2.0 ± 0.2                | 2.0 ± 0.2               | 2.0 ± 0.2                    |
| Posterior wall <sub>s</sub> (mm)                         | 3.4 ± 0.4         | 3.2 ± 0.2                | 3.5 ± 0.2               | 3.3 ± 0.2                    |
| End-diastolic volume (µl)                                | 352 ± 12          | 421 ± 32**               | 398 ± 63                | 460 ± 36*                    |
| End-diastolic volume, <sub>i</sub> (µl/cm <sup>2</sup> ) | 0.63 ± 0.03       | 0.64 ± 0.10              | 0.72 ± 0.12             | 0.69 ± 0.11                  |
| End-systolic volume (µl)                                 | 61 ± 11           | 93 ± 13**                | 66 ± 19                 | 101 ± 19 <sup>***</sup>      |
| End-systolic volume, <sub>i</sub> (µl/cm <sup>2</sup> )  | 0.11 ± 0.02       | 0.14 ± 0.02*             | 0.12 ± 0.03             | 0.15 ± 0.02                  |
| Ejection fraction (%)                                    | 83 ± 3.3          | 79 ± 2.3                 | 84 ± 3.6                | 78 ± 3.5**                   |
| Fractional shortening (%)                                | 54 ± 3.7          | 50 ± 2.3                 | 55 ± 4.3                | 48 ± 4.0**                   |
| Isovolumic contraction time (ms)                         | 17 ± 2.3          | 16 ± 2.4                 | 17 ± 3.0                | 17 ± 3.4                     |
| Aortic ejection time (ms)                                | 63 ± 6.0          | 82 ± 2.3 <sup>***</sup>  | 66 ± 4.3                | 90 ± 3.5 <sup>***,###</sup>  |
| Non-flow time (ms)                                       | 106 ± 7.8         | 133 ± 3.7 <sup>***</sup> | 112 ± 5.2 <sup>#</sup>  | 143 ± 3.8 <sup>***,###</sup> |
| Myocardial performance index E'/A'                       | 0.70 ± 0.08       | 0.63 ± 0.05              | 0.70 ± 0.08             | 0.61 ± 0.06*                 |
| E'/A'                                                    | 0.60 ± 0.17       | 0.86 ± 0.40              | 0.69 ± 0.14             | 1.2 ± 0.3 <sup>**</sup>      |
| Systolic peak wave (mm/s)                                | 42 ± 12           | 38 ± 5.7                 | 48 ± 15                 | 41 ± 5.1                     |

Values are presented as mean ± SD. A', late mitral annulus peak velocity; <sub>d</sub>, in diastole; E', early diastolic mitral annulus peak velocity; <sub>i</sub>, indexed for body surface area, calculated as 9.1 \* body weight in grams<sup>2/3</sup>; <sub>s</sub>, in systole. \*P<0.05, \*\*<0.01, and \*\*\*<0.001 comparing either isoflurane-anaesthetised Lean and Obese treated with saline or isoflurane-anaesthetised Lean and Obese rats treated with ivabradine. #P<0.05, ###<0.01, and ###P<0.001 comparing ivabradine- versus non-ivabradine-treated isoflurane-anaesthetised in each group of rats (either Lean or Obese).

**Supplementary Table S3- Comparison of Ket/Xyl and isoflurane on echocardiography parameters in rats**

| Condition Strain                    | Age(wk) /weight(g)/ Gender (M/F) | Ket (mg/kg) | Xyl (mg/kg) | Isoflurane (%) | Outcome (Ket/Xyl vs Isoflurane)                                                                               | Reference |
|-------------------------------------|----------------------------------|-------------|-------------|----------------|---------------------------------------------------------------------------------------------------------------|-----------|
| Healthy Wistar                      | Adult/275-325/M                  | 0.1         | 0.75        | 1.5            | HR ↓<br>CO ↓<br>SV =<br>EF =<br>EDD and ESD =<br>PW <sub>d</sub> =<br>E ↓<br>A ↓<br>E/A =                     | 1         |
| Healthy Sprague Dawley              | Adult/330/M                      | 30          | 5           | 1.5            | HR ↓<br>CO =<br>SV =<br>EF =<br>EDD and ESD =<br>PW <sub>d</sub> ↑<br>EDV and ESV =<br>S' =                   | 2         |
| Healthy Sprague Dawley              | 10/ND/M                          | 50          | 10          | 1.5            | HR ↓<br>EDD =<br>ESD = (15/30'), ↓ (45')<br>EF =<br>EDV = (15/30'), ↓ (45')<br>ESV = (15/30'), ↓ (45')        | 3         |
| Healthy Fischer 344                 | 9-12/199-290/M                   | 37          | 7           | 1.5            | CO ↓<br>SV =<br>EF =<br>EDD ↓<br>AW <sub>d</sub> =<br>E =<br>A =<br>E/A =<br>DT =<br>IVRT ↑<br>EDV ↑<br>AET ↑ | 4         |
| Healthy Wistar                      | 9/298-306/M                      | 40          | 8           | 2.0            | HR ↓<br>CO ↓<br>EF =<br>EDD ↑<br>E =<br>A ↓<br>E/A ↑<br>DT =<br>E' ↓<br>E/E' ↓                                | 5         |
| Chronic Aortic Regurgitation Wistar | Adult/275-325/M                  | 0.1         | 0.75        | 1.5            | HR ↓<br>CO ↓<br>SV =<br>EF =<br>EDD and ESD ↓<br>PW <sub>d</sub> =<br>E ↓<br>A =<br>E/A =                     | 1         |

A, late mitral inflow peak velocity; AET, aortic ejection time; AW, anterior wall; CO, cardiac output; d, in diastole; DT, deceleration time; E, early mitral inflow peak velocity; E', early diastolic mitral annulus peak velocity; EDD, end-diastolic diameter; EDV, end-diastolic volume; EF, ejection fraction; ESD, end-systolic diameter; ESV, end-systolic volume; F, female; HR, heart rate; IVRT, isovolumic relaxation time; Ket, ketamine; LVID, left ventricular internal diameter; M, male; PW, posterior wall; s, in systole; S', systolic peak wave; SV, stroke volume; Xyl, xylazine. ' indicates the time after the anaesthesia induction.

## **References**

- 1 Plante, E. *et al.* Impact of anesthesia on echocardiographic evaluation of systolic and diastolic function in rats. *J Am Soc Echocardiogr* **19**, 1520-1525, doi:10.1016/j.echo.2006.06.011 (2006).
- 2 Redfors, B., Shao, Y. & Omerovic, E. Influence of anesthetic agent, depth of anesthesia and body temperature on cardiovascular functional parameters in the rat. *Lab Anim* **48**, 6-14, doi:10.1177/0023677213502015 (2014).
- 3 Sano, Y. *et al.* Effects of various types of anesthesia on hemodynamics, cardiac function, and glucose and lipid metabolism in rats. *Am J Physiol Heart Circ Physiol* **311**, H1360-H1366, doi:10.1152/ajpheart.00181.2016 (2016).
- 4 Stein, A. B. *et al.* Effects of anesthesia on echocardiographic assessment of left ventricular structure and function in rats. *Basic Res Cardiol* **102**, 28-41, doi:10.1007/s00395-006-0627-y (2007).
- 5 Droogmans, S. *et al.* Impact of anesthesia on valvular function in normal rats during echocardiography. *Ultrasound Med Biol* **34**, 1564-1572, doi:10.1016/j.ultrasmedbio.2008.02.017 (2008).
